# Supplementary material for: Simple colorimetric paper-based test strip for point-of-use quality testing of ethanol-based hand sanitizers
Source: Royal Society of Chemistry journal article supplement (doi:10.1039/d3ra08110a), 2024-01-01
Supplement: d3ra08110a1.pdf [file d3ra08110a1.pdf]

## **Supplementary material**

### **Novel colorimetric paper-based test strip for point of use quality testing of ethanol-based hand sanitizer**

Aya M. El-Hassanein, Fotouh R. Mansour, Sherin F. Hammad, Aya A. Abdella\*

*Department of Pharmaceutical Analytical Chemistry, Faculty of Pharmacy, Tanta University,  
31111, Egypt.*

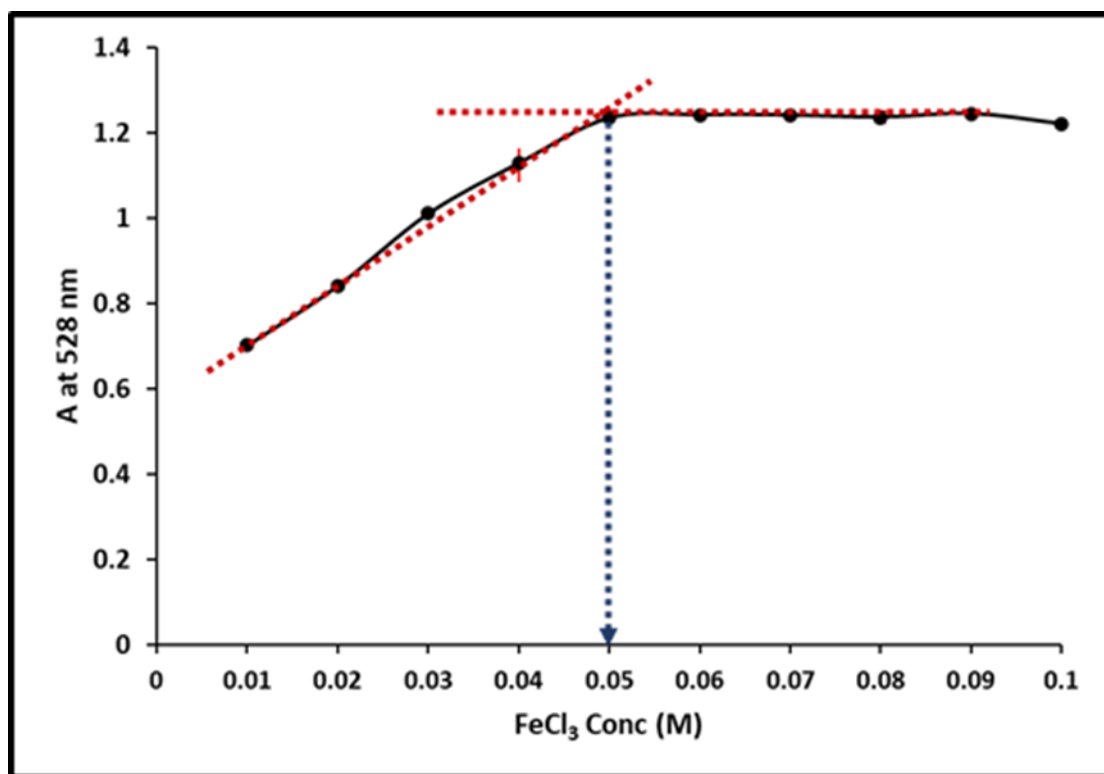

**Fig. S1.** Determination of reaction stoichiometry using Molar-ratio method for Fe<sup>3+</sup> (0.01 - 0.1 M), and MPB 0.2 M (absorbance recorded at 528 nm).

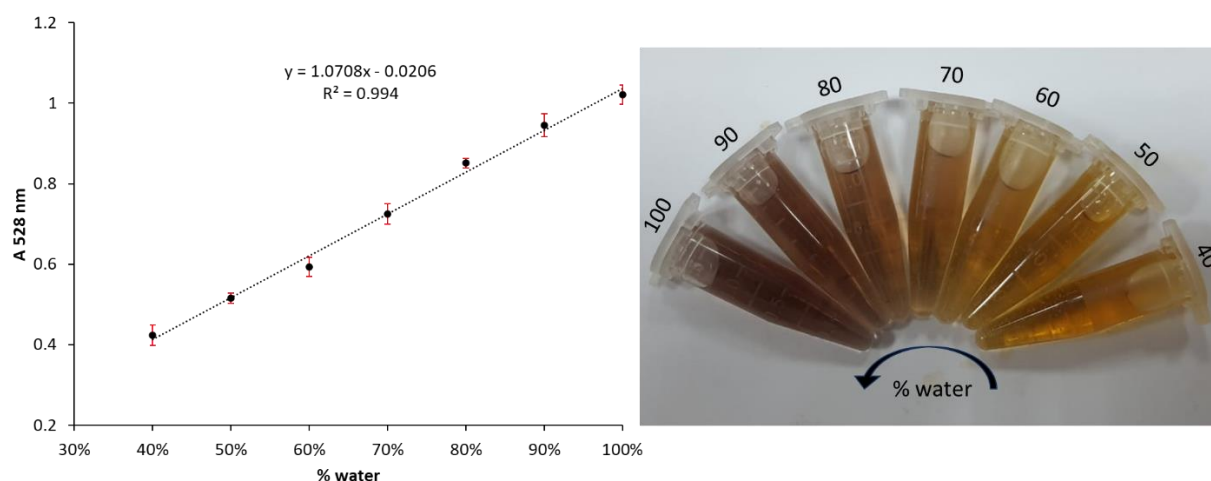

**Fig. S2.** The linear relationship between the developed color and water content (%) using the developed MPB-Fe<sup>3+</sup> sensor within the range of 40–100% (inset: photos of color change using the developed MPB-Fe<sup>3+</sup> sensor within the range of 40–100%).

| <b>a</b> | 0.1                   | 0.2 | 0.3   | 0.4  | 0.5  |     |
|----------|-----------------------|-----|-------|------|------|-----|
|          | CHT (g%)              |     |       |      |      |     |
| <b>b</b> | 0.08                  | 0.1 | 0.125 | 0.17 | 0.25 | 0.5 |
|          | FeCl <sub>3</sub> (M) |     |       |      |      |     |
| <b>c</b> | 20                    | 40  | 60    | 80   | 100  |     |
|          | MPB (mg/mL)           |     |       |      |      |     |

**Fig. S3.** Optimization of PAD preparation conditions. (a) effect of chitosan (CHT) concentration in g%, (b) effect of FeCl<sub>3</sub> concentration in moles, (c) effect of methyl paraben (MPB) concentration in mg/mL on the developed color developed using 70% ethanol.

| Ethanol content (%) | Determinations                                                                      |                                                                                     |                                                                                     |                                                                                     |                                                                                       | Water content (%) |
|---------------------|-------------------------------------------------------------------------------------|-------------------------------------------------------------------------------------|-------------------------------------------------------------------------------------|-------------------------------------------------------------------------------------|---------------------------------------------------------------------------------------|-------------------|
|                     | 1                                                                                   | 2                                                                                   | 3                                                                                   | 4                                                                                   | 5                                                                                     |                   |
| 0                   |    |    |    |    |    | 100               |
| 10                  |    |    |    |    |    | 90                |
| 20                  |    |    |    |    |    | 80                |
| 30                  |    |    |    |    |    | 70                |
| 40                  |    |    |    |    |    | 60                |
| 50                  |    |    |    |    |    | 50                |
| 60                  |   |   |   |   |   | 40                |
| 70                  |  |  |  |  |  | 30                |
| 80                  |  |  |  |  |  | 20                |
| 90                  |  |  |  |  |  | 10                |
| 100                 |  |  |  |  |  | 0                 |

**Fig. S4.** Reproducibility results for the determination of water content (0-100%) in ethanol using the developed paper-based test strip.

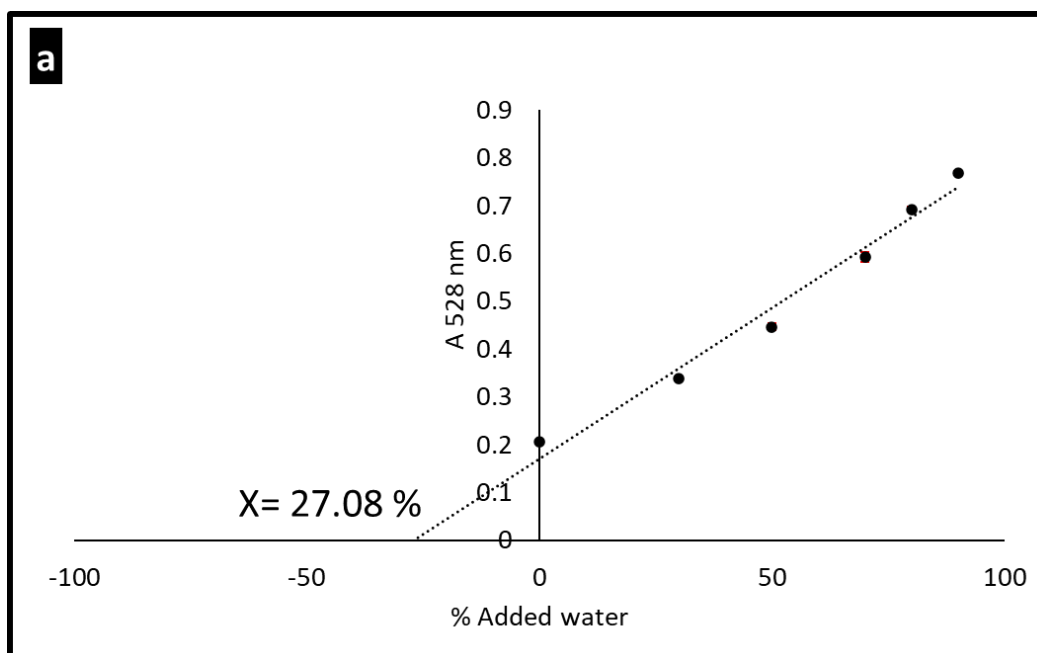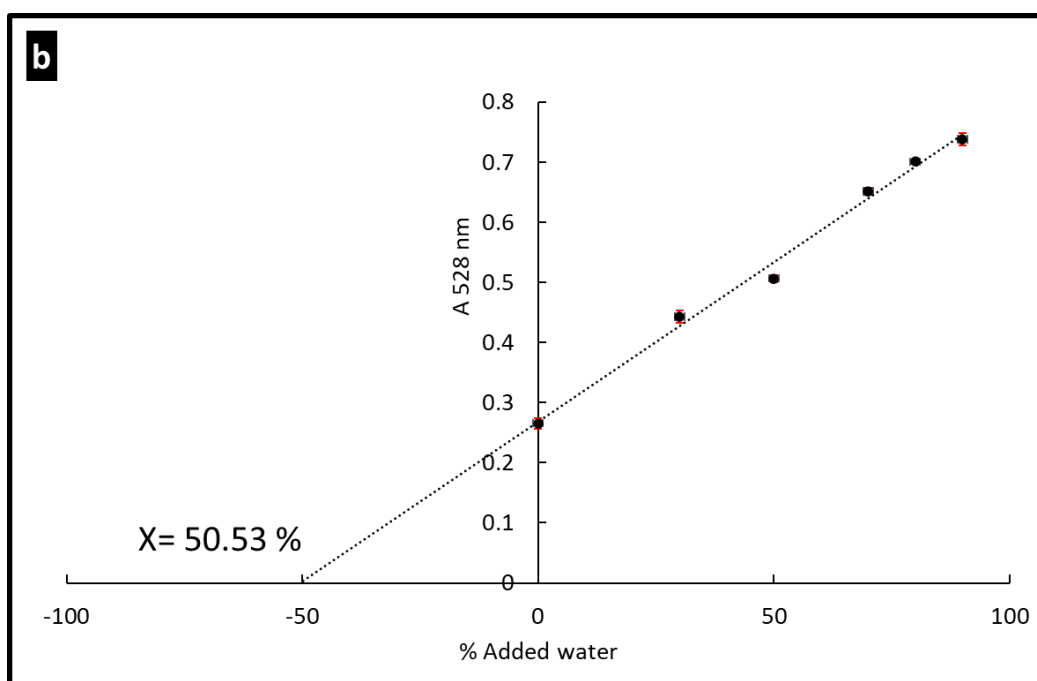

**Fig. S5.** Determination of water content in (a) product I and (b) product II using the proposed spectroscopic method applying standard addition calibration.

**Table S1.** Reported analytical methods for water content determination in different samples compared with the proposed SPCDs sensor.

| Method/Principle                                     | Sample                                    | Time                                      | Linearity range | DL        | Ref.         |
|------------------------------------------------------|-------------------------------------------|-------------------------------------------|-----------------|-----------|--------------|
| <b>Karl Fischer titration</b>                        | Food and pharmaceutical samples           | NR*                                       | NR*             | 0.03%     | <sup>1</sup> |
| <b>Spectrofluorimetric/ AgNCs</b>                    | Ethanol and DMSO                          | Preparation: 10 h<br>Incubation: 2 min    | 20-55%          | 4.48%     | <sup>2</sup> |
| <b>Spectrofluorimetric/ CDs@MOF</b>                  | Organic solvents (ethanol, acetone, ACN)  | Preparation: 60 min<br>Incubation: 45 min | 0–70%           | 0.70% v/v | <sup>3</sup> |
| <b><sup>1</sup>H NMR chemical shifts differences</b> | Organic solvents                          | NR*                                       | 0.5-5%          | NR*       | <sup>4</sup> |
| <b>Colorimetric/ FeCl<sub>3</sub>-MPB</b>            | Ethanol and ethanol-based hand sanitizers | Preparation: 0 min<br>Incubation: 0 min   | 40-100%         | 0.088 %   | This work    |
| <b>FeCl<sub>3</sub>/MPB@CHT-paper</b>                | Ethanol and ethanol-based hand sanitizers | Preparation: 10 min<br>Incubation: 0 min  | 0-100%          | -         | This work    |

\* Not reported.

## References:

- 1 C. A. De Caro, A. Aichert and C. M. Walter, *Food Control*, 2001, **12**, 431–436.
- 2 N. Kong, H. Yuan, H. Zhou, Y. Zhao and S. Zhang, *Anal. Methods*, 2021, **13**, 2722–2727.
- 3 T. Wiwasuku, J. Suebphanpho, S. Ittisanronnachai, V. Promarak, J. Boonmak and S. Youngme, *RSC Adv.*, 2023, **13**, 18138–18144.
- 4 E. Kang, H. R. Park, J. Yoon, H.-Y. Yu, S.-K. Chang, B. Kim, K. Choi and S. Ahn, *Microchem. J.*, 2018, **138**, 395–400.
